# Supplementary material
Source: publisher figshare collection journal article supplement (https://acs.figshare.com/ndownloader/files/14725622)
Supplement: Supplementary file 1 [file 14725622]

## Supporting Information.

### Effect of Histone Lysine Methylation on DNA Lesion Reactivity in Nucleosome Core Particles

*Kun Yang<sup>a</sup>, Carsten Prasse<sup>b</sup> and Marc M. Greenberg<sup>a\*</sup>*

<sup>a</sup>Department of Chemistry, Johns Hopkins University, Baltimore, MD 21218.

<sup>b</sup>Department of Environmental Health and Engineering, Johns Hopkins University, Baltimore, MD 21218.

[mgreenberg@jhu.edu](mailto:mgreenberg@jhu.edu)

## Contents:

1. Nano LC-Orbitrap MS procedure (S2)
2. **Figure S1.** Preparation of 145-mer DNA containing  $\beta$ -2'-F-MdG<sub>89</sub>. (S2)
3. **Figure S2.** ESI-MS of histone proteins determined by UPLC-MS. (S3)
4. **Figure S3.** Nano LC-Orbitrap MS of peptide fragments (a.a. 20-23) obtained by trypsin digestion of propionic anhydride treated H4-K20C-me0 and H4-K20C-me. (S4)
5. **Figure S4.** Native PAGE analysis of reconstituted NCPs. (S5)
6. **Figure S5.** DNase I digestion of NCPs. (S6)
7. **Figure S6.** Representative 10% SDS-PAGE analysis of the products from NCPs containing AP in the absence of NaBH<sub>3</sub>CN. (S7)
8. **Figure S7.** Representative 10% SDS-PAGE analysis of the products from NCPs containing AP in the presence of 30 mM NaBH<sub>3</sub>CN. (S8)
9. **Figure S8.** Representative 10% SDS-PAGE analysis of the DPCs from NCPs containing  $\beta$ -2'-F-MdG<sub>89</sub>. (S9)
10. **Figure S9.** Proximity of C8-dG<sub>89</sub> to H4-K20 in a NCP. (S10)

*Nano LC-Orbitrap MS experimental procedure.* Peptides were analyzed by on-line nanoflow LC-Orbitrap MS on a Dionex UltiMate 3000 RSLCnano system connected to a QExactive HF instrument (Thermo Fisher Scientific) via a Nanospray Flex ion source. Peptides were trapped on a C18P Pepmap100, 5  $\mu$ m, 100 Å (5 mm x 300  $\mu$ m internal diameter) column and separated on an Acclaim Pepmap RSLC C18, 2  $\mu$ m, 100 Å analytical column (15 cm  $\times$  75  $\mu$ m internal diameter; Thermo Fisher Scientific). Mobile phases consisted of 0.1% formic acid (solvent A) and 0.1% formic acid in acetonitrile (solvent B). Chromatographic separation was achieved using the following gradient: 0-5 min, 5% B; 5-40 min, 5-55% B; 40-40.1 min 55-90% B; 40.1-45 min 90% B; 45-45.1 min 90-5% B; 45.1-60 min 5% B. The flow rate was set to 300  $\mu$ L min<sup>-1</sup>, the temperature of the sample tray was set to 4 °C and the injection volume was 1  $\mu$ L.

The QExactive HF mass spectrometer was operated using positive ionization in full MS/dd-MS<sup>2</sup> mode. The spray voltage and capillary temperature were maintained at 1.8 kV and 250°C, respectively. The S-Lens RF level was set at 65. Full MS scans were acquired over the  $m/z$  200–2000 range with a resolving power of 120,000 at  $m/z$  200. The five most intense peaks were selected for fragmentation (MS<sup>2</sup>). Detection for all MS<sup>2</sup> spectra was performed with a resolving power of 30,000 at  $m/z$  200. The target value for MS scans was  $3 \times 10^6$  ions, and the target value for MS<sup>2</sup> scans was  $1 \times 10^5$  ions. HCD collision energy was 30 eV.

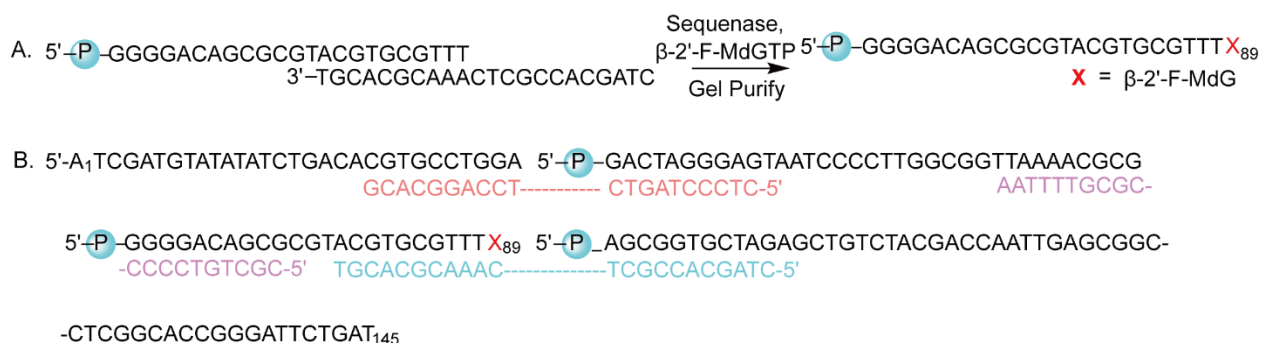

**Figure S1:** Preparation of 145-mer DNA containing  $\beta$ -2'-F-MdG<sub>89</sub>. A. Incorporation of  $\beta$ -2'-F-MdG to position 89 by Sequenase. B. Enzymatic ligation to generate 145-mer 601 DNA containing  $\beta$ -2'-F-MdG<sub>89</sub>. The ligated product was purified by denaturing PAGE.

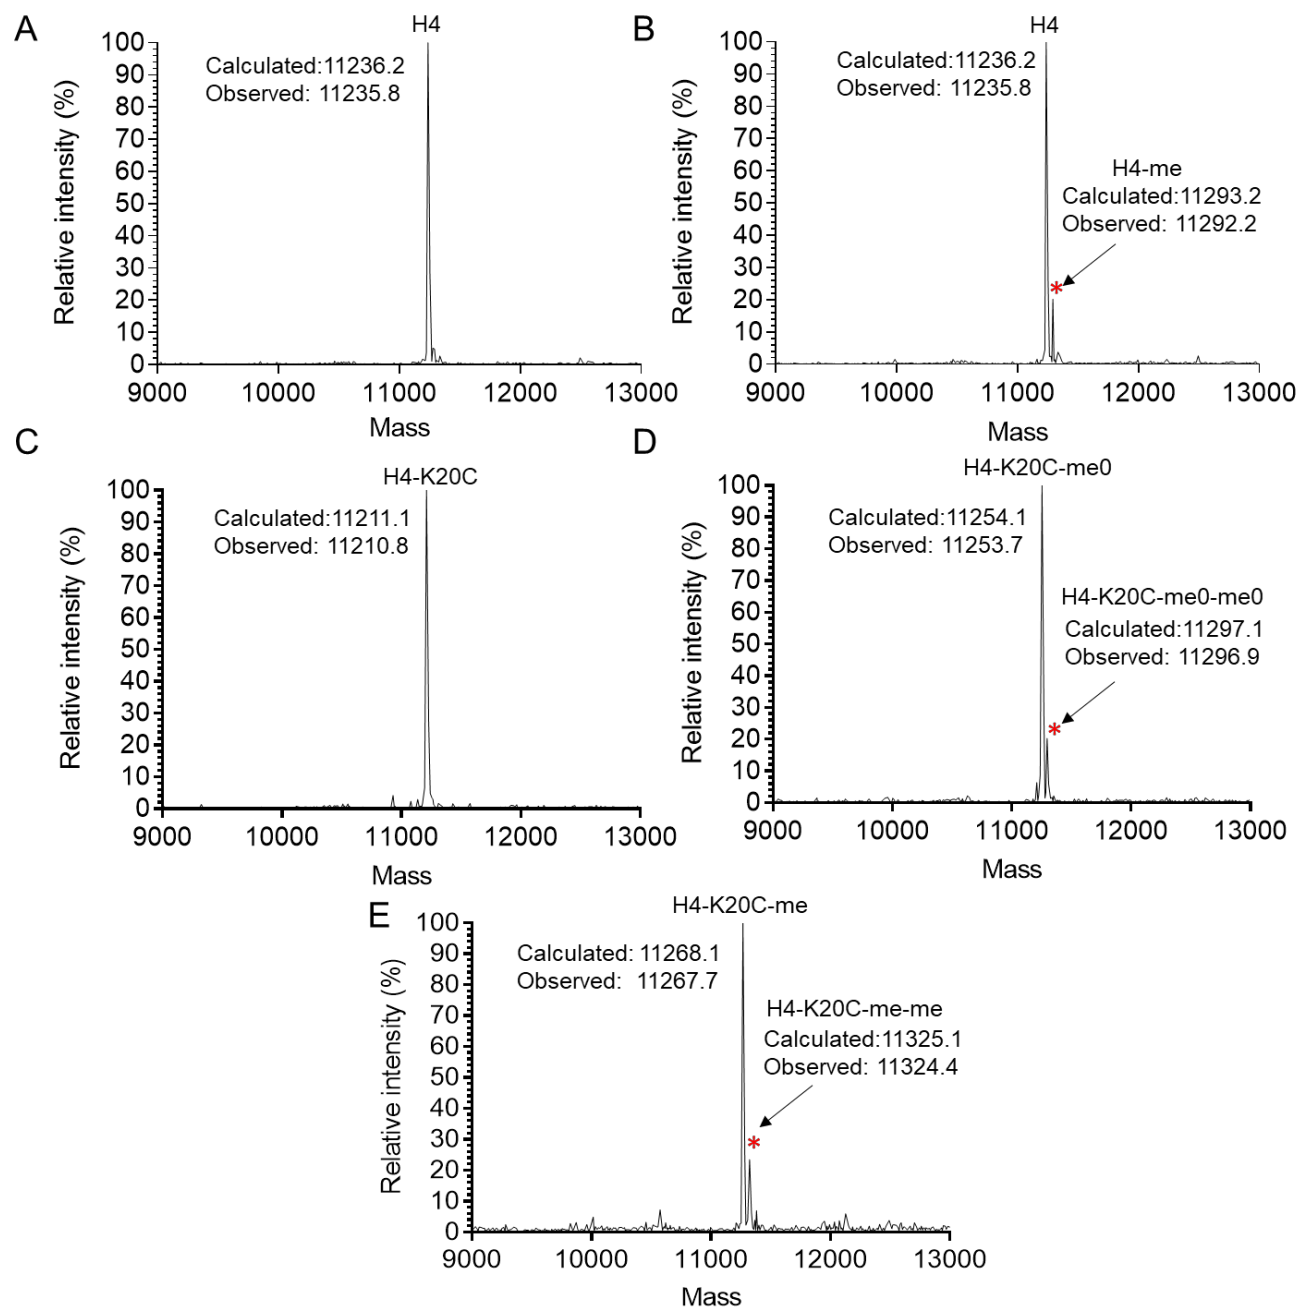

**Figure S2:** ESI-MS of histone proteins determined by UPLC-MS. A. Wild type H4. B. Reaction product of wild type histone H4 with 2-chloroethyl methylammonium chloride. C. H4-K20C. D. H4-K20C-me0. E. H4-K20C-me. The asterisk (\*) indicates the undesired alkylation possibly at lysine residues of histone H4.

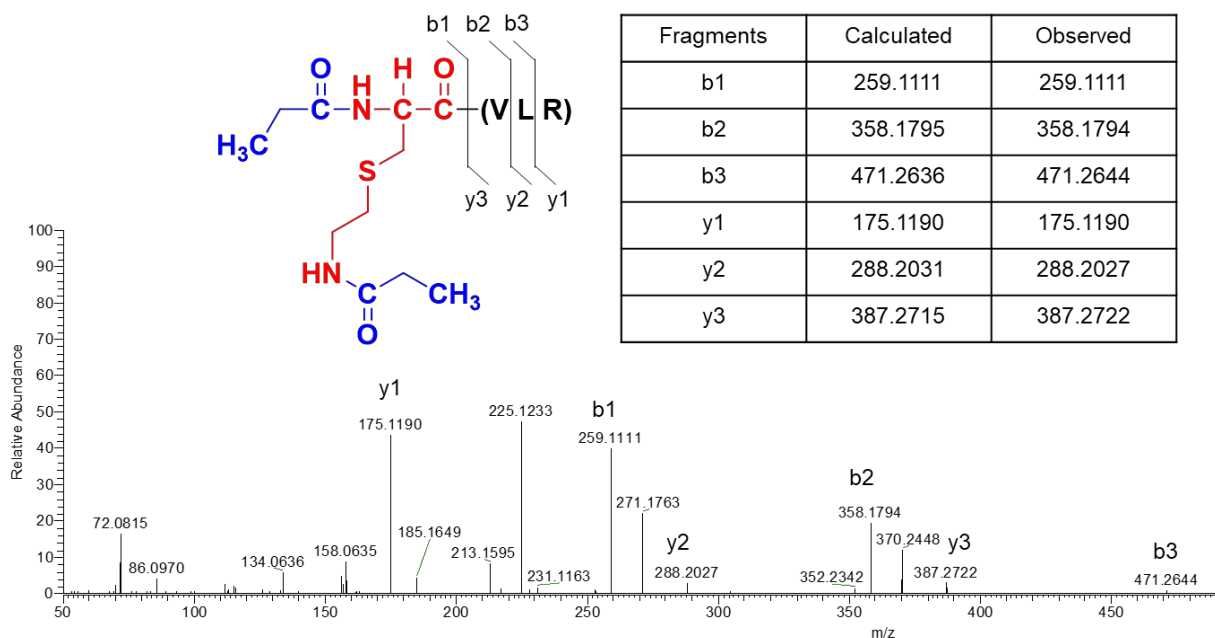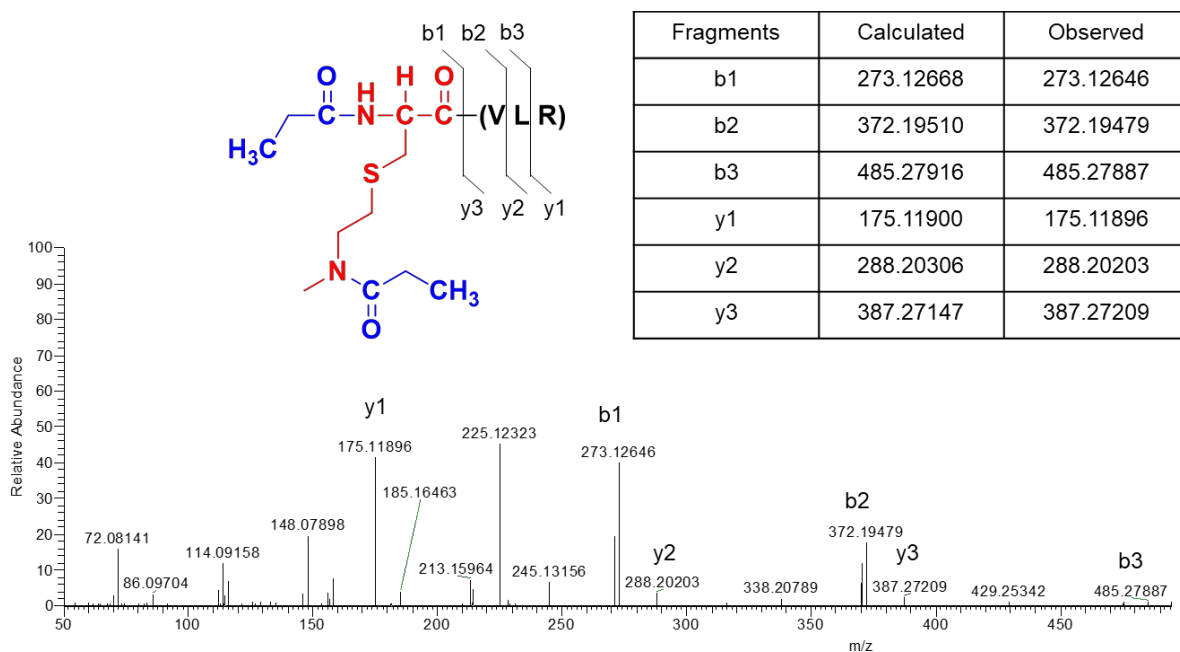

**Figure S3.** Nano LC-Orbitrap MS of peptide fragments (a.a. 20-23) obtained by trypsin digestion of propionic anhydride treated H4-K20C-me0 and H4-K20C-me. (Note: Samples were treated again with propionic anhydride after trypsin digestion.)

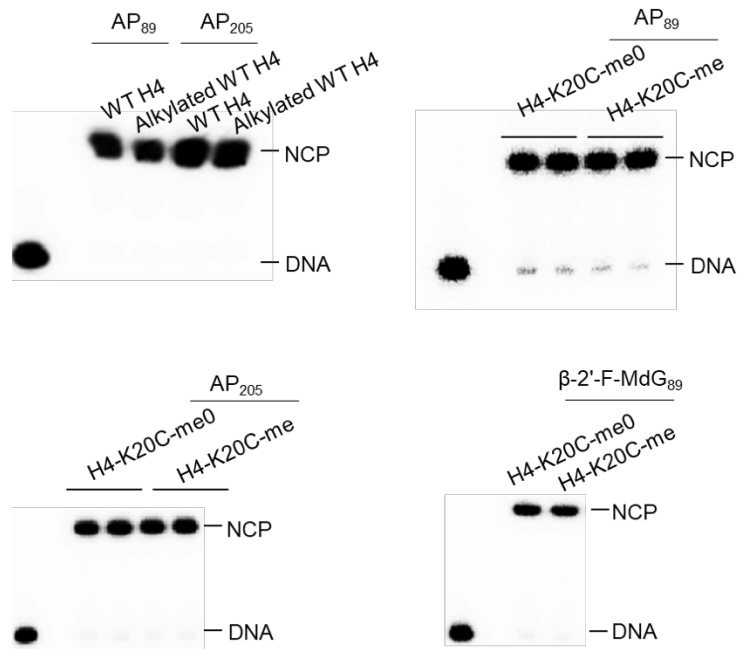

**Figure S4:** Native PAGE analysis of the reconstituted NCPs.

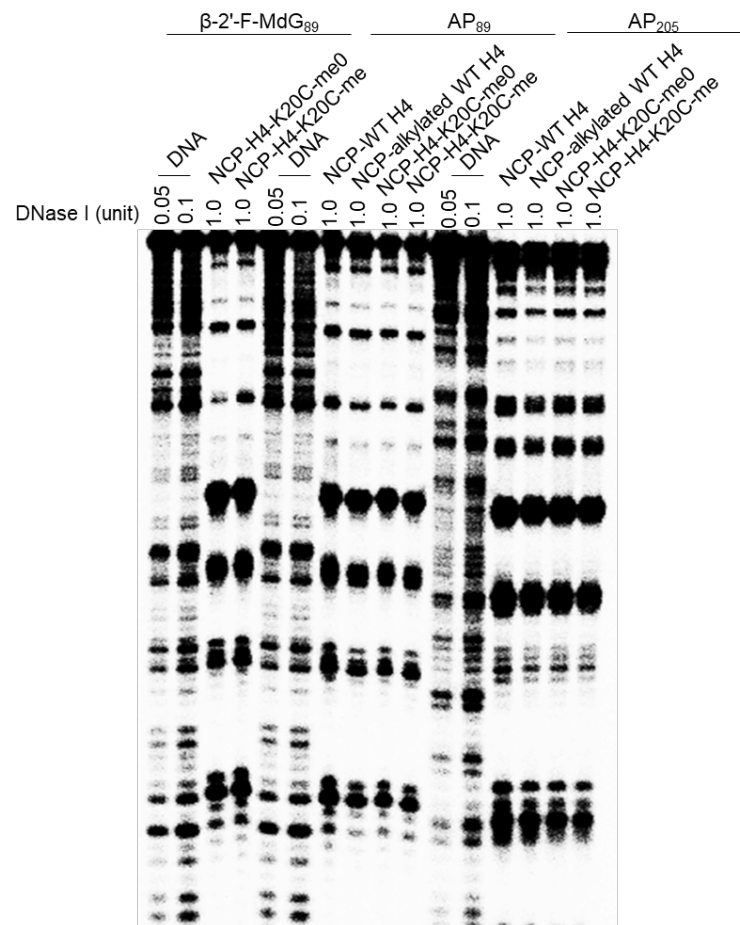

**Figure S5:** DNase I digestion of NCPs.

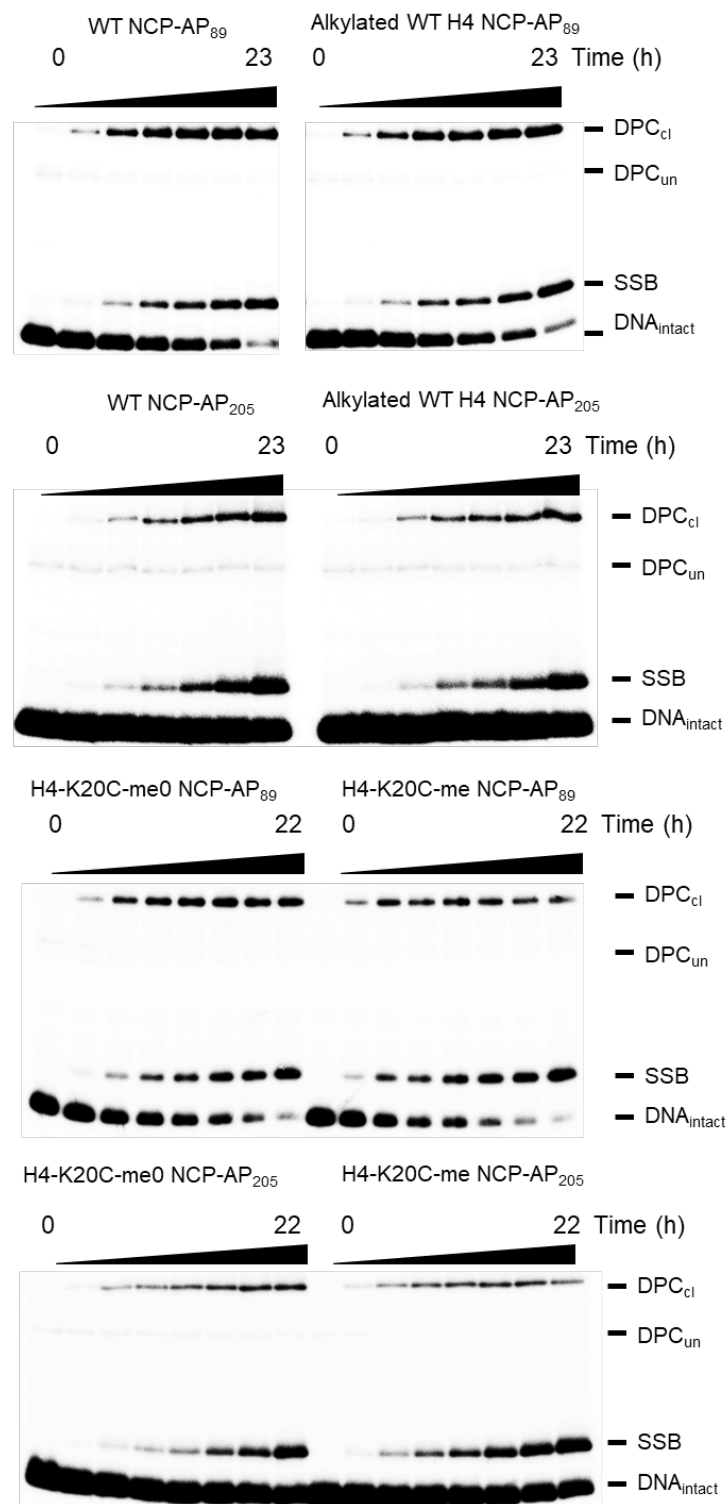

**Figure S6:** Representative 10% SDS-PAGE analysis of the products from NCPs containing AP in the absence of NaBH<sub>3</sub>CN.

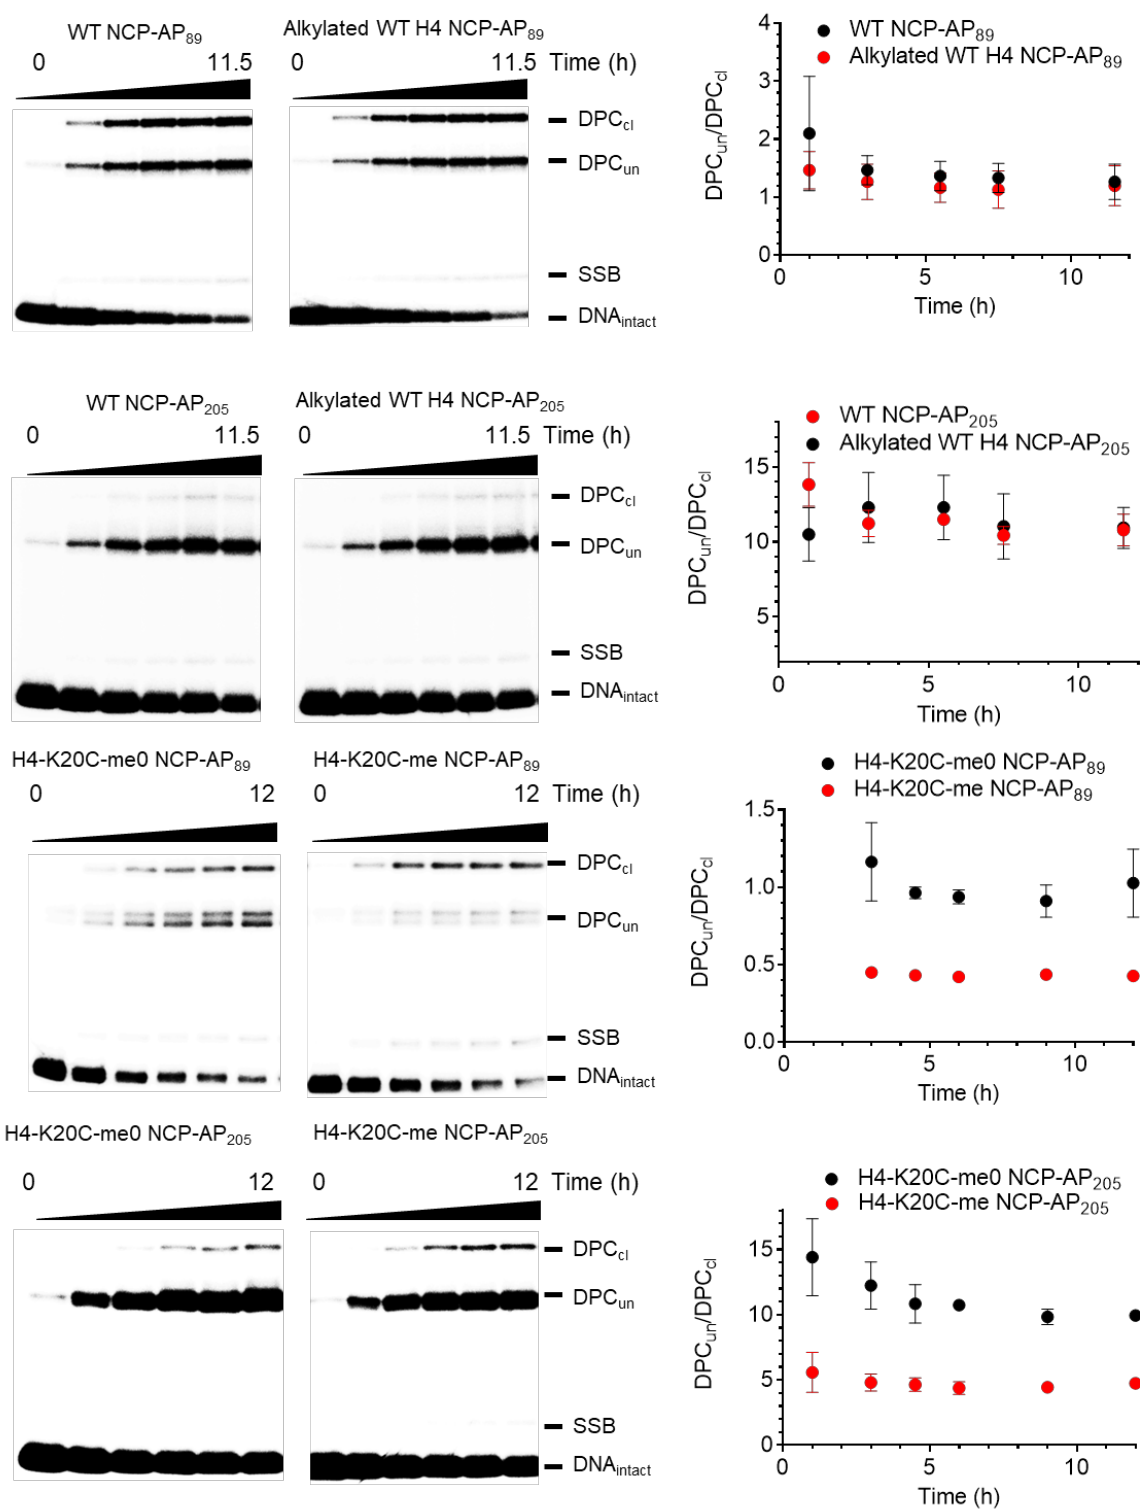

**Figure S7:** Representative 10% SDS-PAGE analysis of the products from NCPs containing AP in the presence of 30 mM NaBH<sub>3</sub>CN.



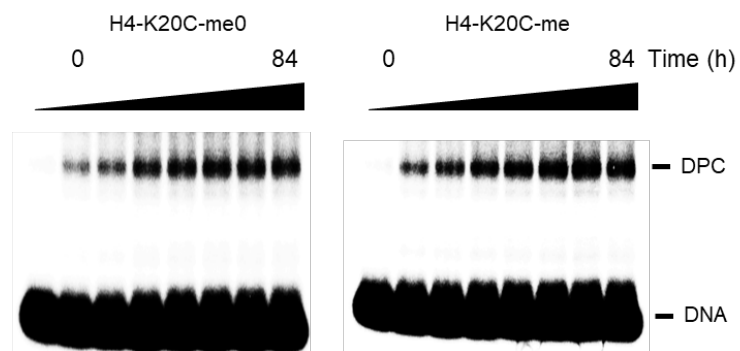

**Figure S8:** Representative 10% SDS-PAGE analysis of the DPCs from NCPs containing  $\beta$ -2'-F-MdG<sub>89</sub>.

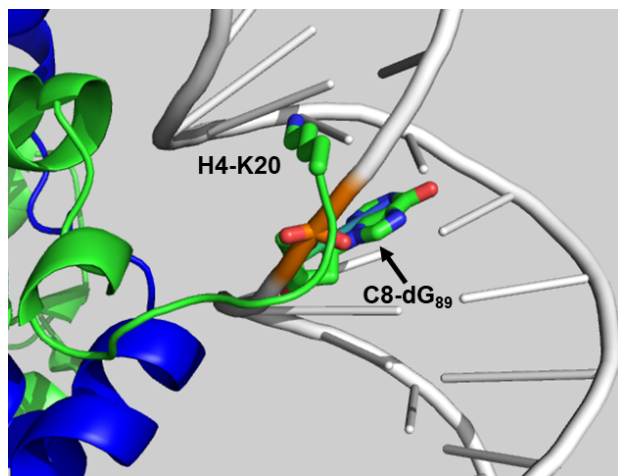

**Figure S9:** Proximity of C8-dG<sub>89</sub> to H4-K20 in a NCP. PDB: 1aoi.
